# Supplementary material
Source: PubMed Central journal article supplement (PMC3705111)
Supplement: 11357_2012_9430_MOESM1_ESM.pdf [file 11357_2012_9430_MOESM1_ESM.pdf]

## Chronic caloric restriction partially protects against age-related alteration in serum metabolome

Jennifer M. De Guzman<sup>1</sup>, Ginger Ku<sup>1</sup>, Ryan Fahey<sup>1</sup>, Yun-Hee Youm<sup>2</sup>, Ignatius Kass<sup>4</sup>, Donald K. Ingram<sup>3</sup>, Vishwa Deep Dixit<sup>2</sup>, and Indu Kheterpal<sup>1\*</sup>

<sup>1</sup>Protein Structural Biology and Proteomics and Metabolomics Core, <sup>2</sup>Immunobiology Laboratory, and <sup>3</sup>Nutritional Neuroscience and Aging, Pennington Biomedical Research Center, Louisiana State University System, Baton Rouge LA; <sup>4</sup>Waters Corporation, Beverly, MA

**\*Corresponding Author:** Indu Kheterpal, PhD

Protein Structural Biology

Pennington Biomedical Research Center

Louisiana State University System

6400 Perkins Road

Baton Rouge, LA 70808, USA

Phone: 225-763-2534

Fax: 225-763-0274

E-mail: [Indu.Kheterpal@pbrc.edu](mailto:Indu.Kheterpal@pbrc.edu)

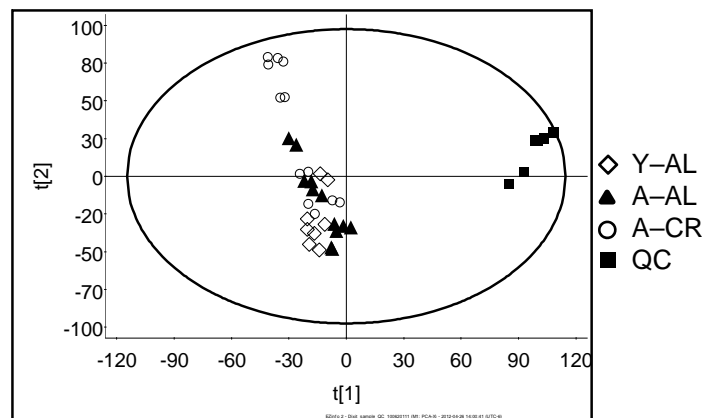

**Fig. S-1** PCA score scatter plot of the three animal groups and quality control (QC) samples.

## Supplementary Table 1

**Table S-1** List of identified metabolites exhibiting differential levels among Y-AL, A-AL, and A-CR groups.

| Number | [M+H] <sup>+</sup>     | Retention time (min) | Assignment                                                                    | Identification                                                  |
|--------|------------------------|----------------------|-------------------------------------------------------------------------------|-----------------------------------------------------------------|
| 1      | 166.087 <sup>a,c</sup> | 0.32                 | Phenylalanine *                                                               | METLIN                                                          |
| 2      | 240.102 <sup>a</sup>   | 13.95                | Hydroxyacetylaminofluorene *                                                  | MMCD                                                            |
| 3      | 263.238 <sup>a</sup>   | 14.33                | C <sub>18</sub> H <sub>31</sub> O *                                           | METLIN                                                          |
| 4      | 265.254 <sup>a</sup>   | 14.8                 | Octadecadienal *                                                              | METLIN                                                          |
| 5      | 279.234 <sup>a,c</sup> | 14.65                | Linolenic acid **                                                             | METLIN                                                          |
| 6      | 279.234 <sup>a,c</sup> | 15.01                | Linolenic acid **                                                             | METLIN                                                          |
| 7      | 283.265 <sup>a</sup>   | 14.8                 | C <sub>18</sub> H <sub>35</sub> O <sub>2</sub> *                              | METLIN                                                          |
| 8      | 302.307 <sup>a</sup>   | 12.67                | Sphinganine **                                                                | m/z 95.1, 284.3;<br>METLIN                                      |
| 9      | 323.258 <sup>a</sup>   | 14.73                | C <sub>20</sub> H <sub>35</sub> O <sub>3</sub> *                              | METLIN                                                          |
| 10     | 326.308 <sup>a,c</sup> | 14.34                | Oleoyl ethanolamide **                                                        | METLIN                                                          |
| 11     | 331.264 <sup>a</sup>   | 13.84                | Docosapentaenoic acid *                                                       | Standard;<br>MassTRIX (Biosynthesis of unsaturated fatty acids) |
| 12     | 337.275 <sup>a</sup>   | 13.06                | Pregnane derivative (C <sub>21</sub> H <sub>36</sub> O <sub>3</sub> ) **      | KEGG                                                            |
| 13     | 337.275 <sup>a</sup>   | 14.32                | Pregnane derivative (C <sub>21</sub> H <sub>36</sub> O <sub>3</sub> ) **      | KEGG                                                            |
| 14     | 343.196 <sup>c</sup>   | 14.62                | Tripeptide (C <sub>15</sub> H <sub>27</sub> N <sub>4</sub> O <sub>5</sub> ) * | METLIN                                                          |
| 15     | 351.290 <sup>a</sup>   | 15.23                | 12,15-epoxy-13,14-dimethyleicosa-12,14-dienoic acid *                         | METLIN                                                          |
| 16     | 357.276 <sup>a</sup>   | 14.9                 | C <sub>24</sub> H <sub>37</sub> O <sub>2</sub> **                             | METLIN                                                          |
| 17     | 357.277 <sup>c</sup>   | 12.53                | Tetracosahexaenoic acid *                                                     | METLIN;<br>Mass fragment analysis                               |
| 18     | 357.301 <sup>a</sup>   | 14.8                 | MG(18:0) *                                                                    | METLIN                                                          |
| 19     | 359.220 <sup>a</sup>   | 12.81                | C <sub>22</sub> H <sub>31</sub> O <sub>4</sub> *                              | METLIN                                                          |
| 20     | 370.296 <sup>a</sup>   | 12.22                | Cis-5-tetradecenoylcarnitine *                                                | m/z 85, 144.1, 209.2, 311.2;<br>METLIN                          |
| 21     | 372.311 <sup>a,c</sup> | 12.57                | Tetradecanoyl carnitine *                                                     | m/z 85, 144.1, 313.2;<br>METLIN                                 |
| 22     | 374.254 <sup>a</sup>   | 14.33                | Tripeptide consisting of Ala, Lys, and Arg **                                 | METLIN                                                          |

|    |                          |       |                                                                           |                                                                                                                                                                                                     |
|----|--------------------------|-------|---------------------------------------------------------------------------|-----------------------------------------------------------------------------------------------------------------------------------------------------------------------------------------------------|
| 23 | 379.282 <sup>a</sup>     | 14.8  | C <sub>23</sub> H <sub>39</sub> O <sub>4</sub> **                         | METLIN                                                                                                                                                                                              |
| 24 | 391.359 <sup>a</sup>     | 15.28 | Hexacosatrienoic acid *                                                   | METLIN                                                                                                                                                                                              |
| 25 | 399.326 <sup>a,b</sup>   | 14.43 | C <sub>27</sub> H <sub>43</sub> O <sub>2</sub> *                          | METLIN                                                                                                                                                                                              |
| 26 | 400.343 <sup>a,c</sup>   | 13.17 | Palmitoyl carnitine *                                                     | Standard;<br>METLIN;<br>MassTRIX (Fatty acid metabolism)                                                                                                                                            |
| 27 | 415.322 <sup>a,c</sup>   | 14.32 | Vitamin D3 derivative (C <sub>27</sub> H <sub>43</sub> O <sub>3</sub> )*  | METLIN                                                                                                                                                                                              |
| 28 | 417.336 <sup>a,b,c</sup> | 13.62 | 7 $\alpha$ -dihydroxy-4-cholesten-3-one *                                 | METLIN;<br>MassTRIX (endocrine and other factor-regulated calcium reabsorption, primary bile acid biosynthesis, steroid biosynthesis, and mineral absorption);<br>Mass fragment analysis (MassLynx) |
| 29 | 417.336 <sup>a,c</sup>   | 14.38 | Sterol lipid (C <sub>27</sub> H <sub>45</sub> O <sub>3</sub> ) *          | METLIN                                                                                                                                                                                              |
| 30 | 419.349 <sup>a,c</sup>   | 14.83 | Sterol lipid (C <sub>27</sub> H <sub>47</sub> O <sub>3</sub> ) *          | METLIN                                                                                                                                                                                              |
| 31 | 424.343 <sup>a</sup>     | 12.94 | Linoleyl or Linoelaidyl carnitine *                                       | m/z 85, 144.1;<br>METLIN                                                                                                                                                                            |
| 32 | 426.359 <sup>a,c</sup>   | 13.28 | Oleoyl carnitine *                                                        | Standard                                                                                                                                                                                            |
| 33 | 431.189 <sup>a</sup>     | 13.33 | Tripeptide consisting of Trp, Pro, and Glu **                             | METLIN                                                                                                                                                                                              |
| 34 | 435.348 <sup>a,c</sup>   | 14.38 | Sterol lipid (C <sub>27</sub> H <sub>47</sub> O <sub>4</sub> ) *          | METLIN;<br>MassTRIX (primary bile acid biosynthesis)                                                                                                                                                |
| 35 | 442.351 <sup>a,c</sup>   | 12.74 | 3-hydroxy-octadecenoyl carnitine *                                        | HMDB                                                                                                                                                                                                |
| 36 | 448.343 <sup>a</sup>     | 12.93 | 2-docosanamidoethanesulfonic acid **                                      | METLIN                                                                                                                                                                                              |
| 37 | 457.368 <sup>a,c</sup>   | 15.26 | Vitamin D3 derivative (C <sub>30</sub> H <sub>49</sub> O <sub>3</sub> ) * | METLIN                                                                                                                                                                                              |
| 38 | 460.271 <sup>c</sup>     | 12.21 | 17-phenyl trinor Prostaglandin E2 serinol amide *                         | m/z 91.1;<br>METLIN                                                                                                                                                                                 |
| 39 | 460.282 <sup>a</sup>     | 13.06 | BW A868C *                                                                | METLIN                                                                                                                                                                                              |
| 40 | 465.357 <sup>a,c</sup>   | 14.5  | C <sub>28</sub> H <sub>49</sub> O <sub>5</sub> *                          | METLIN                                                                                                                                                                                              |
| 41 | 473.199 <sup>a</sup>     | 12.94 | Tripeptide consisting of His, Met, and Trp *                              | METLIN                                                                                                                                                                                              |
| 42 | 475.342 <sup>a,c</sup>   | 14.5  | 18-acetoxy-1 $\alpha$ ,25-dihydroxyvitamin D3 *                           | m/z 121.1, 159.1;<br>METLIN                                                                                                                                                                         |
| 43 | 475.34 <sup>a,c</sup>    | 14.37 | 18-acetoxy-1 $\alpha$ ,25-dihydroxyvitamin D3 *                           | METLIN                                                                                                                                                                                              |
| 44 | 476.279 <sup>a</sup>     | 12.69 | LysoPE(18:3) *                                                            | m/z 335.3, 458.3;<br>METLIN                                                                                                                                                                         |
| 45 | 477.357 <sup>a,c</sup>   | 14.83 | 1 $\alpha$ ,25-dihydroxy-2 $\beta$ -(2-hydroxyethoxy)vitamin D3 *         | METLIN                                                                                                                                                                                              |

|    |                        |       |                                                                            |                                                                                   |
|----|------------------------|-------|----------------------------------------------------------------------------|-----------------------------------------------------------------------------------|
| 46 | 478.293 <sup>a</sup>   | 13.06 | LysoPE(18:2) *                                                             | m/z 198.1; 216.1, 337.3, 460.3;<br>METLIN                                         |
| 47 | 494.324 <sup>c</sup>   | 13.04 | LysoPC(16:1) *                                                             | m/z 184, 240.1, 476.3;<br>METLIN;<br>MassTRIX (glycerophospholipid<br>metabolism) |
| 48 | 494.325 <sup>b</sup>   | 12.71 | LysoPC(16:1) *                                                             | m/z 184, 240.1, 476.3;<br>METLIN;<br>MassTRIX (glycerophospholipid<br>metabolism) |
| 49 | 494.325 <sup>b,c</sup> | 12.85 | LysoPC(16:1) *                                                             | m/z 184, 240.1, 476.3;<br>METLIN;<br>MassTRIX (glycerophospholipid<br>metabolism) |
| 50 | 496.378 <sup>a,c</sup> | 15.49 | 2-O-methyl PAF C-16 *                                                      | m/z 184, 313.2;<br>METLIN                                                         |
| 51 | 500.278 <sup>a</sup>   | 12.02 | LysoPE(20:5) *                                                             | m/z 359.3;<br>METLIN;<br>Elemental composition analysis                           |
| 52 | 508.339 <sup>a,b</sup> | 13.2  | LysoPC(17:1) *                                                             | m/z 184, 240.1, 325.3, 490.3;<br>METLIN                                           |
| 53 | 516.304 <sup>b</sup>   | 12.71 | Taurocholic Acid **                                                        | m/z 462.3;<br>HMDB                                                                |
| 54 | 516.311 <sup>b,c</sup> | 12.85 | LysoPC(18:4) *                                                             | m/z 184, 240.1, 498.3;<br>METLIN;<br>MassTRIX (glycerophospholipid<br>metabolism) |
| 55 | 518.324 <sup>a</sup>   | 11.75 | LysoPC(18:3) *                                                             | m/z 104, 166, 184;<br>METLIN                                                      |
| 56 | 519.405 <sup>a,c</sup> | 15.34 | Vitamin D3 derivative (C <sub>32</sub> H <sub>55</sub> O <sub>5</sub> ) *  | METLIN                                                                            |
| 57 | 536.414 <sup>c</sup>   | 15    | 11 $\alpha$ -(4-dimethylaminophenyl)-1 $\alpha$ ,25-dihydroxyvitamin D3 ** | METLIN                                                                            |
| 58 | 542.324 <sup>a,c</sup> | 12.05 | LysoPC(20:5) *                                                             | m/z 184, 240.1, 524.3;<br>METLIN;<br>MassTRIX (glycerophospholipid<br>metabolism) |
| 59 | 542.325 <sup>a</sup>   | 12.74 | LysoPC(20:5) *                                                             | m/z 184, 240.1, 524.3;<br>METLIN;<br>MassTRIX (glycerophospholipid<br>metabolism) |

|    |                        |       |                                                           |                                                                                                                                                                    |
|----|------------------------|-------|-----------------------------------------------------------|--------------------------------------------------------------------------------------------------------------------------------------------------------------------|
| 60 | 543.323 <sup>a,c</sup> | 14.65 | Belladonnine *                                            | KEGG                                                                                                                                                               |
| 61 | 544.342 <sup>a</sup>   | 12.21 | LysoPC(20:4) *                                            | m/z 184, 526.3;<br>METLIN                                                                                                                                          |
| 62 | 548.371 <sup>a</sup>   | 13.73 | LysoPC(O-18:2/2:0) *                                      | METLIN;<br>Mass fragment analysis (MassLynx)                                                                                                                       |
| 63 | 552.404 <sup>a</sup>   | 14.25 | LysoPC(20:0) or PC(2:0/O-18:0) *                          | METLIN                                                                                                                                                             |
| 64 | 570.360 <sup>a</sup>   | 13.45 | LysoPC(22:5) **                                           | m/z 184, 240.1, 258.1, 552.3;<br>METLIN                                                                                                                            |
| 65 | 572.373 <sup>a</sup>   | 13.63 | LysoPC(22:4) *                                            | m/z 184, 389.3, 554.3;<br>METLIN                                                                                                                                   |
| 66 | 575.469 <sup>a,c</sup> | 15.83 | DG (15:0/18:4) *                                          | METLIN                                                                                                                                                             |
| 67 | 606.449 <sup>a</sup>   | 15.43 | LysoPC(24:1) *                                            | m/z 184, 588.4;<br>METLIN;<br>Elemental composition analysis                                                                                                       |
| 68 | 647.512 <sup>c</sup>   | 15.34 | SM(d18:1/12:0) *                                          | m/z 104, 166, 184;<br>METLIN;<br>MassTRIX (sphingolipid metabolism)                                                                                                |
| 69 | 756.552 <sup>a</sup>   | 16.39 | PC(16:1/18:2) *                                           | m/z 184, 476.3, 494.3, 502.3, 520.3;<br>METLIN                                                                                                                     |
| 70 | 818.572 <sup>a</sup>   | 16.34 | PE (C <sub>47</sub> H <sub>81</sub> NO <sub>8</sub> P) *  | METLIN                                                                                                                                                             |
| 71 | 852.575 <sup>a</sup>   | 15.49 | PS (C <sub>47</sub> H <sub>83</sub> NO <sub>10</sub> P) * | Lipidmaps                                                                                                                                                          |
| 72 | 854.568 <sup>a,c</sup> | 16.03 | PC(20:4/22:6) or PC(22:6/20:4) *                          | m/z 184, 526.3, 550.3;<br>METLIN;<br>MassTRIX (glycerophospholipid metabolism, linoleic acid and alpha-linolenic acid metabolism, and arachidonic acid metabolism) |

<sup>a</sup> Feature that exhibits differential level between A–CR and Y–AL groups

<sup>b</sup> Feature that exhibits differential level between A–AL and Y–AL groups

<sup>c</sup> Feature that exhibits differential level between A–AL and A–CR groups

\* Mass accuracy is within 0-5 ppm error

\*\* Mass accuracy is within 6-10 ppm error

The identification column includes details on the databases and fragment ions used for identification.

PC: phosphatidylcholine; PE: phosphatidylethanolamine; PS: phosphatidylserine; SM: sphingomyelin; DG: diacylglycerol;

MG: monoacylglycerol

## Supplementary Table 2

**Table S-2** List of unidentified features exhibiting differential levels among Y-AL, A-AL, and A-CR groups.

| Number | [M+H] <sup>+</sup>     | Retention time (min) |
|--------|------------------------|----------------------|
| 1      | 131.005 <sup>a,c</sup> | 14.33                |
| 2      | 133.035 <sup>a</sup>   | 0.45                 |
| 3      | 150.060 <sup>c</sup>   | 0.94                 |
| 4      | 153.069 <sup>c</sup>   | 1                    |
| 5      | 158.119 <sup>c</sup>   | 0.45                 |
| 6      | 159.068 <sup>c</sup>   | 0.95                 |
| 7      | 197.119 <sup>a,c</sup> | 14.33                |
| 8      | 209.121 <sup>b,c</sup> | 11.84                |
| 9      | 245.228 <sup>a</sup>   | 14.33                |
| 10     | 247.244 <sup>a</sup>   | 14.8                 |
| 11     | 263.24 <sup>a</sup>    | 14.23                |
| 12     | 290.638 <sup>a</sup>   | 12.05                |
| 13     | 293.662 <sup>a,c</sup> | 13.73                |
| 14     | 302.638 <sup>a</sup>   | 12.04                |
| 15     | 310.167 <sup>a,c</sup> | 11.45                |
| 16     | 312.113 <sup>c</sup>   | 0.94                 |
| 17     | 314.666 <sup>a</sup>   | 13.8                 |
| 18     | 339.270 <sup>c</sup>   | 12.53                |
| 19     | 339.290 <sup>a</sup>   | 14.8                 |
| 20     | 341.353 <sup>a</sup>   | 15.14                |
| 21     | 351.230 <sup>a,c</sup> | 14.51                |
| 22     | 355.255 <sup>a,c</sup> | 14.32                |
| 23     | 363.261 <sup>c</sup>   | 14.8                 |
| 24     | 364.270 <sup>c</sup>   | 15                   |
| 25     | 367.229 <sup>a</sup>   | 13.31                |
| 26     | 376.269 <sup>a</sup>   | 14.8                 |
| 27     | 378.273 <sup>a</sup>   | 14.32                |
| 28     | 383.189 <sup>a</sup>   | 13.31                |
| 29     | 389.337 <sup>a,c</sup> | 14.49                |
| 30     | 422.328 <sup>a</sup>   | 12.67                |
| 31     | 432.770 <sup>a</sup>   | 14.23                |
| 32     | 432.781 <sup>a,c</sup> | 13.94                |
| 33     | 437.285 <sup>a,c</sup> | 13.85                |
| 34     | 449.198 <sup>a</sup>   | 13.33                |
| 35     | 454.390 <sup>a</sup>   | 13.73                |
| 36     | 458.797 <sup>a</sup>   | 14.32                |

| Number | [M+H] <sup>+</sup>     | Retention time (min) |
|--------|------------------------|----------------------|
| 37     | 459.221 <sup>c</sup>   | 14.05                |
| 38     | 464.313 <sup>a</sup>   | 13.7                 |
| 39     | 465.328 <sup>a</sup>   | 14.28                |
| 40     | 467.154 <sup>a</sup>   | 10.99                |
| 41     | 473.327 <sup>a,c</sup> | 14.54                |
| 42     | 473.335 <sup>a,c</sup> | 14.32                |
| 43     | 473.820 <sup>a</sup>   | 14.79                |
| 44     | 476.314 <sup>b,c</sup> | 12.85                |
| 45     | 477.230 <sup>a,c</sup> | 14.05                |
| 46     | 487.337 <sup>a,c</sup> | 14.52                |
| 47     | 491.34 <sup>a,c</sup>  | 14.5                 |
| 48     | 492.420 <sup>a</sup>   | 15.24                |
| 49     | 507.345 <sup>a,c</sup> | 14.65                |
| 50     | 509.364 <sup>a,c</sup> | 14.31                |
| 51     | 512.336 <sup>b</sup>   | 11.48                |
| 52     | 513.297 <sup>b</sup>   | 12.85                |
| 53     | 522.325 <sup>a,c</sup> | 14.05                |
| 54     | 524.278 <sup>a,c</sup> | 12.02                |
| 55     | 524.313 <sup>a</sup>   | 12.74                |
| 56     | 529.391 <sup>a,c</sup> | 14.85                |
| 57     | 534.314 <sup>b</sup>   | 12.8                 |
| 58     | 536.334 <sup>a</sup>   | 11.75                |
| 59     | 537.402 <sup>a,c</sup> | 14.59                |
| 60     | 540.298 <sup>a</sup>   | 12.72                |
| 61     | 541.387 <sup>a</sup>   | 15.34                |
| 62     | 541.407 <sup>a</sup>   | 14.8                 |
| 63     | 543.346 <sup>a,c</sup> | 14.14                |
| 64     | 547.435 <sup>a,c</sup> | 15.58                |
| 65     | 549.296 <sup>a</sup>   | 12.78                |
| 66     | 556.350 <sup>c</sup>   | 14.2                 |
| 67     | 560.336 <sup>a,c</sup> | 12.05                |
| 68     | 561.295 <sup>a</sup>   | 12.74                |
| 69     | 565.442 <sup>a,c</sup> | 15.06                |
| 70     | 566.327 <sup>a</sup>   | 13                   |
| 71     | 566.327 <sup>a</sup>   | 12.81                |
| 72     | 569.419 <sup>a,c</sup> | 15.57                |

| Number | [M+H] <sup>+</sup>     | Retention time (min) |
|--------|------------------------|----------------------|
| 73     | 582.319 <sup>a,c</sup> | 12.05                |
| 74     | 590.391 <sup>a</sup>   | 13.8                 |
| 75     | 597.45 <sup>a,c</sup>  | 15.83                |
| 76     | 602.418 <sup>b</sup>   | 15.4                 |
| 77     | 606.316 <sup>a</sup>   | 12.04                |
| 78     | 617.474 <sup>a,c</sup> | 15.6                 |
| 79     | 621.436 <sup>a</sup>   | 15.81                |
| 80     | 628.435 <sup>a</sup>   | 15.43                |
| 81     | 632.463 <sup>a</sup>   | 15.53                |
| 82     | 645.433 <sup>a</sup>   | 15.56                |
| 83     | 647.449 <sup>a</sup>   | 15.83                |
| 84     | 673.528 <sup>a,c</sup> | 15.44                |
| 85     | 759.946 <sup>b,c</sup> | 12.85                |
| 86     | 773.582 <sup>a,c</sup> | 15.52                |
| 87     | 798.970 <sup>a</sup>   | 12.96                |
| 88     | 798.971 <sup>a</sup>   | 13.15                |
| 89     | 805.017 <sup>a,c</sup> | 14.13                |
| 90     | 821.407 <sup>a</sup>   | 14.71                |
| 91     | 831.945 <sup>a</sup>   | 12.74                |
| 92     | 864.592 <sup>a</sup>   | 15.98                |
| 93     | 894.600 <sup>a</sup>   | 15.93                |
| 94     | 916.583 <sup>a,c</sup> | 15.93                |
| 95     | 986.542 <sup>a</sup>   | 14.71                |
| 96     | 998.626 <sup>a</sup>   | 13.08                |

<sup>a</sup> Feature that exhibits differential level between A–CR and Y–AL groups

<sup>b</sup> Feature that exhibits differential level between A–AL and Y–AL groups

<sup>c</sup> Feature that exhibits differential level between A–AL and A–CR groups
